# Supplementary material for: Catalytic activity for CO oxidation of Cu–CeO2 composite nanoparticles synthesized by a hydrothermal method
Source: Royal Society of Chemistry journal article supplement (doi:10.1039/c5ay00261c), 2015-01-01
Supplement: c5ay00261c1.pdf [file c5ay00261c1.pdf]

## Supporting Information

### **Catalytic activity for CO oxidation of Cu-CeO<sub>2</sub> composite nanocubes synthesized by a hydrothermal method**

Yuxiu Li<sup>a</sup>, Yun Cai<sup>a</sup>, Xinxin Xing<sup>a</sup>, Nan Chen<sup>a</sup>, Dongyang Deng<sup>a</sup>, Yude Wang<sup>a,b\*</sup>

*a Department of Materials Science and Engineering, Yunnan University, 650091 Kunming, Peoples' Republic of China*

*b Yunnan Province Key Lab of Mico-Nano Materials and Technology, Yunnan University, 650091 Kunming, People's Republic of China*

E-mail: ydwang@ynu.edu.cn (Y. D. Wang)

---

\* To whom correspondence should be addressed. Tel: +86-871-65031124, Fax: +86-871-65153832.

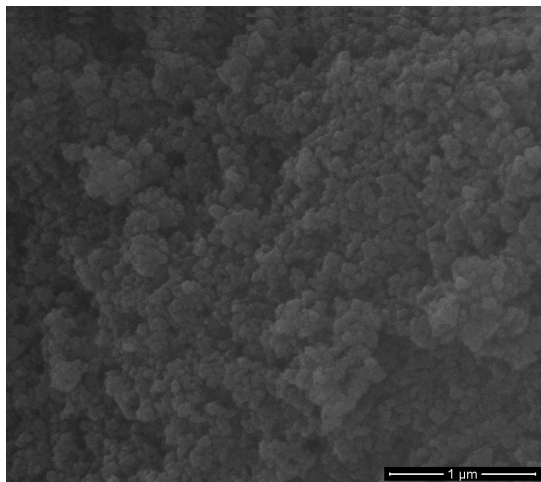

**Figure S1** SEM image of 30Cu-CeO<sub>2</sub> composite nanoparticles.

SEM image revealed that there were various sizes of particles in the 30Cu-CeO<sub>2</sub> nanoparticles. Most particles are irregular morphology and the large particles were composed of small crystallites.

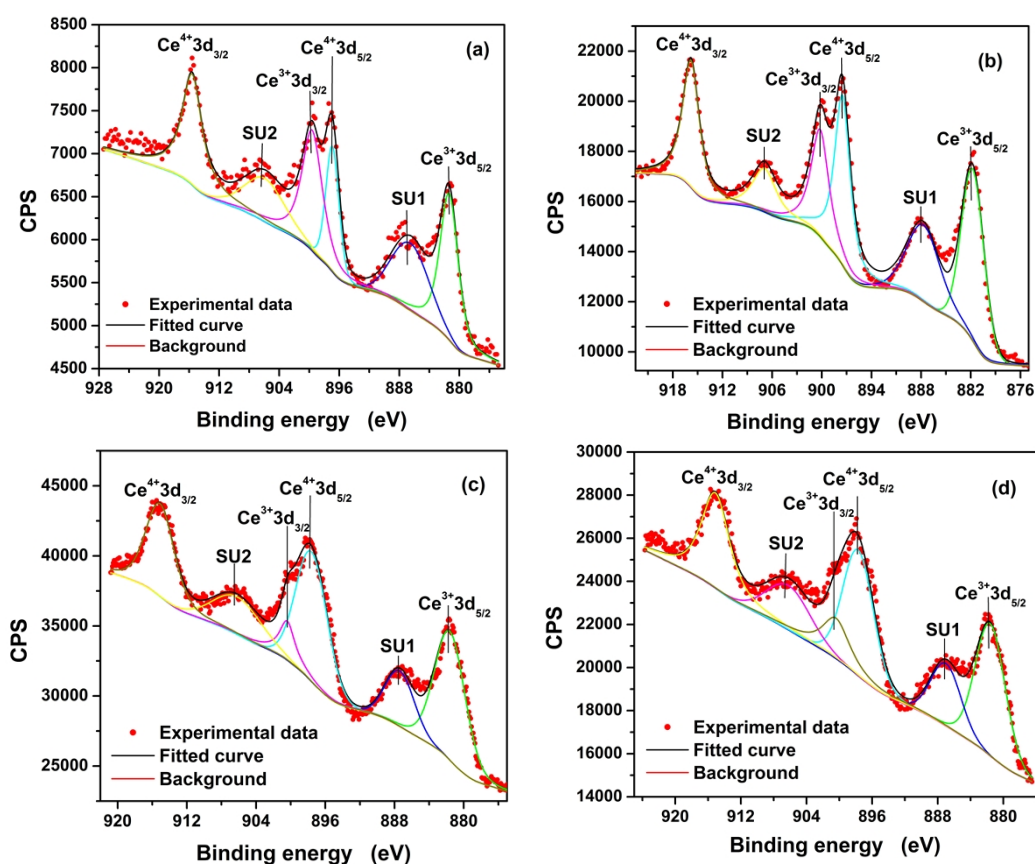

**Fig**

re S2 The high-resolution XPS spectra of Ce3d obtained on Cu-CeO<sub>2</sub> composite nanoparticles with the different Cu contents: (a) CeO<sub>2</sub>, (b) 10Cu-CeO<sub>2</sub>, (c) 30Cu-CeO<sub>2</sub>, and (d) 40Cu-CeO<sub>2</sub>, respectively.

The main features are composed of six peaks corresponding to the three pairs of spin-orbit doublets. Due to its highly non-stoichiometric nature, both valences (3+ and 4+) are present in CeO<sub>2</sub>. The main peaks of Ce<sup>4+</sup> 3d<sub>3/2</sub> and Ce<sup>4+</sup> 3d<sub>5/2</sub> are shown at binding energies of ~915.7 and ~897.0 eV, respectively. Those of Ce<sup>3+</sup> 3d<sub>3/2</sub> and Ce<sup>3+</sup> 3d<sub>5/2</sub> are located at ~899.8 and ~881.7 eV. Two additional satellite lines SU1 and SU2, which means ‘shake-up’, are shown at ~906.2 eV on the Ce<sup>3+</sup> 3d<sub>3/2</sub> and at ~887.1 eV on the Ce<sup>3+</sup> 3d<sub>5/2</sub>, respectively.

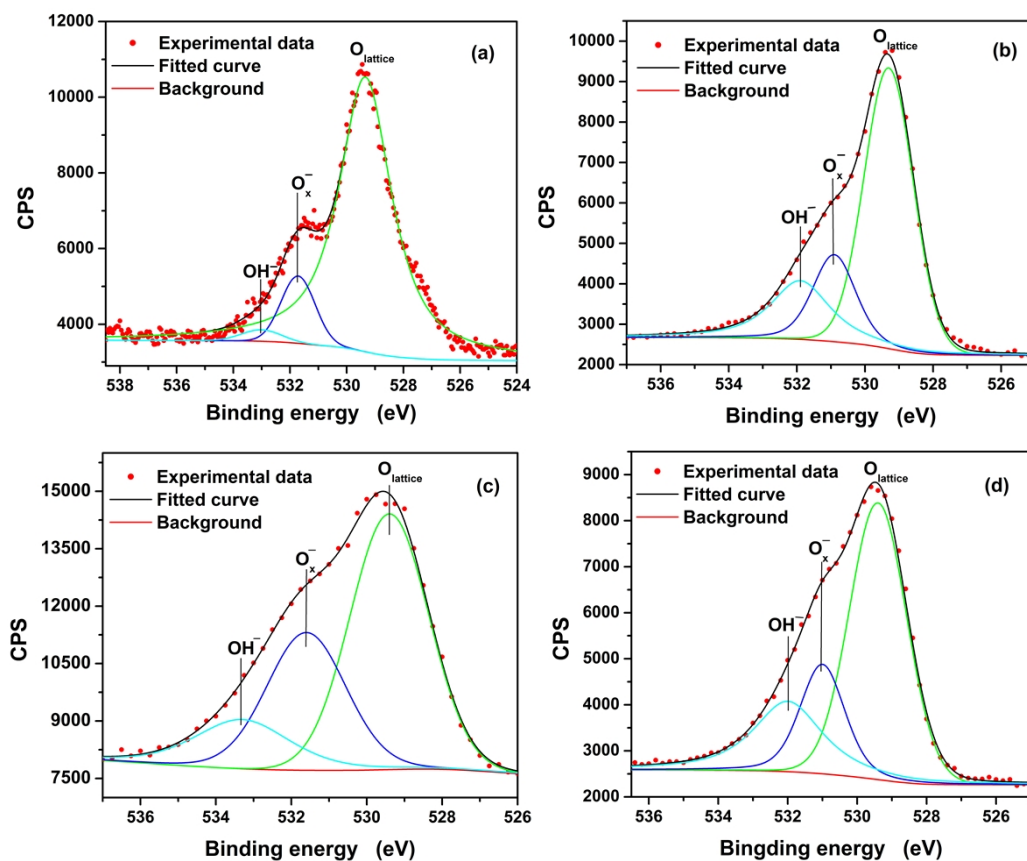

**Figure S3** XPS region spectra of O1s obtained on Cu-CeO<sub>2</sub> composite nanoparticles with the different Cu contents: (a) CeO<sub>2</sub>, (b) 10Cu-CeO<sub>2</sub>, (c) 30Cu-CeO<sub>2</sub>, and (d) 40Cu-CeO<sub>2</sub>, respectively.

All the spectra show a peak at about 529.4 eV, which is assigned to oxygen ions (O<sub>lattice</sub>) in CeO<sub>2</sub>. Two evident shoulders at higher binding energies at ~531.7 and ~533 eV are present and attributable to oxygen vacancies and hydroxyl groups, respectively.

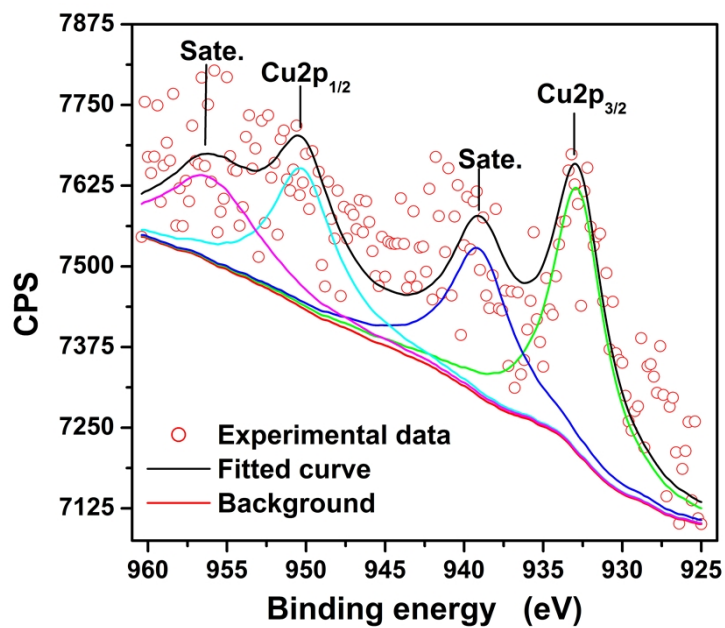

**Figure S4** The high-resolution XPS spectrum of superposed Cu2p for 30Cu-CeO<sub>2</sub> composite nanoparticles.

The XPS spectra for Cu were simple and easily fitted to Cu<sup>0</sup> species, indicating little oxidation of the Cu nanoparticles.

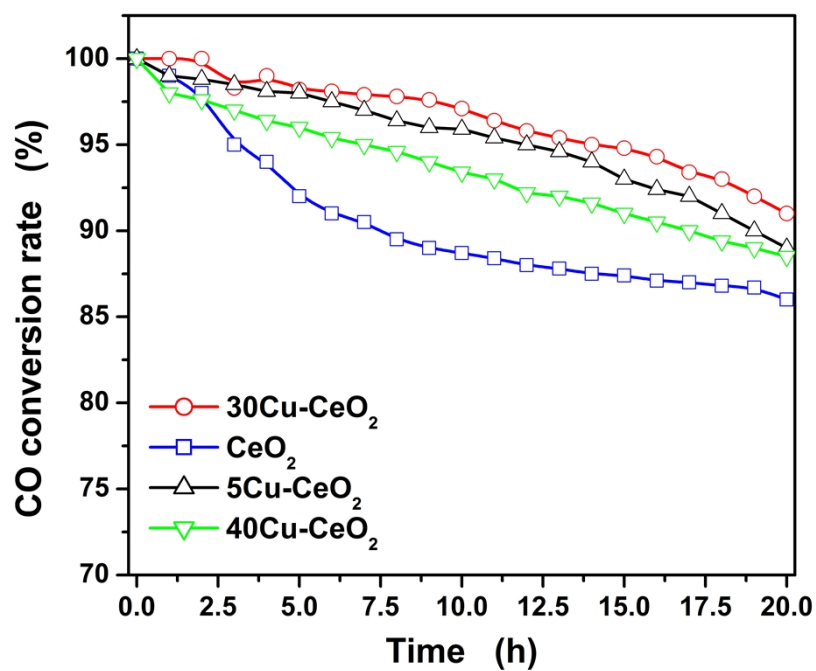

**Figure S5** Time-on-stream CO conversion on Cu-CeO<sub>2</sub> composite nanoparticles (CeO<sub>2</sub> nanoparticles at 260 °C, 5Cu-CeO<sub>2</sub> composite at 340 °C, 30Cu-CeO<sub>2</sub> composite at 180 °C, and 40Cu-CeO<sub>2</sub> composite at 200 °C, respectively).

**Table S1** The phase compositions of Cu-CeO<sub>2</sub> composite nanoparticles from XRD patterns.

| Phase composition<br>(Cu/CeO <sub>2</sub> ) | Cu-CeO <sub>2</sub> composite nanoparticles |       |       |       |       |       |
|---------------------------------------------|---------------------------------------------|-------|-------|-------|-------|-------|
|                                             | 0%Cu                                        | 5%Cu  | 10%Cu | 20%Cu | 30%Cu | 40%Cu |
| Cu                                          | 0                                           | 2.61  | 8.03  | 14.1  | 24.1  | 5.7   |
| CeO <sub>2</sub>                            | 100                                         | 97.39 | 91.97 | 80.3  | 70.8  | 40.9  |
| CuO                                         | 0                                           | 0     | 0     | 5.6   | 5.1   | 53.4  |
